# Supplementary material for: Competitive Hybridization of a Microarray Identifies CMKLR1 as an Up-Regulated Gene in Human Bone Marrow-Derived Mesenchymal Stem Cells Compared to Human Embryonic Fibroblasts
Source: MDPI journal article supplement (doi:10.3390/cimb44040102), 2022-03-28
Supplement: s1 [file s1]

**Supplementary Table S1. Sequences of PCR primers.**

| Gene           | GenBank<br>Accession | Forward                | Reverse                | Product<br>Length<br>(bp) |
|----------------|----------------------|------------------------|------------------------|---------------------------|
| CD70           | NM_001252.4          | GTCACTTGGGTGGGACGTAG   | AGTGAGGTTGGTGCAGAGTG   | 364                       |
| CD321          | NM_001113207.1       | CTCGCTTCCTGAACTCCGTT   | TAGTTGCGAGCCCCAGTGTA   | 288                       |
| CD339          | NM_000214.2          | CTGTCCATGCAGAACGTGAAC  | CAGCCTTGTCGGCAAATAGC   | 596                       |
| CD18           | NM_000211.4          | GATGACGGCTTCCATTTCGC   | TGGGGATGATCTCGGTGAGT   | 226                       |
| CD58           | NM_001779.2          | TATCCCAAGCAGCGGTCATT   | ATTGGAGTTGGTTCTGTCTGGT | 136                       |
| CD59           | NM_203330.2          | ACAACCCGCTTGAGGGAAAA   | TGCTGCCAGAAATGGAGTCA   | 141                       |
| CD98           | NM_003486.6          | CGTCAATGGGTCCCTGTTCA   | CTTCTGACACAGGACGGTCG   | 481                       |
| CD51           | NM_002210.4          | GGGACTCCTGCTACCTCTGT   | GCTCCAAACCACTGATGGGA   | 315                       |
| ANKRD1         | NM_014391.2          | AACCTGTGGATGTGCCACG    | AGTCTCACCGCATCATGCAA   | 436                       |
| DLX5           | NM_005221.5          | TTCCAAGCTCCGTTCCAGAC   | GTAATGCGGCCAGCTGAAAG   | 409                       |
| FOXC1          | NM_001453.2          | TCGGCTTGAACAACCTCTCCAG | ACAGTCGTAGACGAAAGCTCC  | 104                       |
| GATA6          | NM_005257.5          | TGGATTGTCTGTGCCAACT    | CCTGAGGCTGTAGGTTGTGT   | 300                       |
| HOXA6          | NM_024014.3          | AGTCTCCCGGACAAGACGTA   | GGCTGCGTGGAATTGATGAG   | 530                       |
| HOXA9          | NM_152739.3          | TGGGCAACTACTACGTGGAC   | GTTGGCTGCTGGGTTATTGG   | 578                       |
| HOXC4          | NM_014620.5          | CCCGAGAAATCACAGTCGCT   | ACTTTGGTGTTGGGGAGTCG   | 395                       |
| HOXC8          | NM_022658.3          | CGCACCACGTTCAAGACTTC   | TCCAAGGTCTGATACCGGCT   | 331                       |
| IRX1           | NM_024337.3          | TAGCCACGGACTGTACACCT   | AGGTCTCTCTCTGGGAGCGT   | 246                       |
| IRX5           | NM_005853.5          | CCTATCCGAGGGCTACTTG    | CTCAGCTCCTCCTGCTTCG    | 662                       |
| NFATC1         | NM_172387.2          | TTCGAGTTTAACCAGCGCGA   | GCCCAAGCACGAGGTTATCT   | 300                       |
| NFIB           | NM_005596.3          | GACAAAGTCTGGCGTCTGGA   | GGAGGTGGAGTTCGAGTTGA   | 713                       |
| RUNX3          | NM_001031680.2       | CTACCACCGAGCCATCAAGG   | GGGTCGGAGAATGGGTTCAG   | 240                       |
| TBX1           | NM_080647.1          | GGTCACTGCCTACCAGAACC   | GGGCAATAGTCGTAGGAGCC   | 666                       |
| FOXF2          | NM_001452.1          | GCCGCCCTACTCGTACATC    | ACCACGCGGTGGTACATGG    | 333                       |
| MEIS1          | NM_002398.2          | CACGGGACTCACCATCCTTC   | CACTCATAGGTCCTGGTGCTC  | 194                       |
| RUNX1T1        | NM_004349.3          | TGCAGCAGTTTGGCAATGAC   | TGGTTCTGTCTGGAGTTTCGC  | 348                       |
| CMKLR1         | NM_001142343         | AGGGAAGAGCAAGAACACGA   | CTTTCATCCAAACCAGACAC   | 176                       |
| RARRES2        | NM_002889.3          | GGAATTTCAACAGCACCCGC   | AAGGCGAACTGTCCAGGGAA   | 363                       |
| $\beta$ -Actin | NM_001101.5          | GGCATCGTGATGGACTCCG    | GCTGGAAGGTGGACAGCGA    | 612                       |

**Supplementary Table S2. List of genes up- and down-regulated more than two folds in hBMSC against hEF and FDR<0.05.**

| Systematic    | Genbank      | Gene Symbol | hBMSC/<br>hEF<br>(Norm) | Log2<br>(norm) | P-value | FDR   |
|---------------|--------------|-------------|-------------------------|----------------|---------|-------|
| A_23_P170649  | NM_153225    | C8orf84     | 402.807                 | 8.654          | 0.000   | 0.047 |
| A_23_P171074  | NM_004867    | ITM2A       | 186.550                 | 7.543          | 0.000   | 0.047 |
| A_32_P66881   | NM_138554    | TLR4        | 148.599                 | 7.215          | 0.000   | 0.047 |
| A_33_P3235147 | NM_005221    | DLX5        | 147.837                 | 7.208          | 0.000   | 0.047 |
| A_33_P3368453 | NM_000247    | MICA        | 108.207                 | 6.758          | 0.000   | 0.047 |
| A_23_P386320  | NM_033316    | MFI2        | 71.460                  | 6.159          | 0.000   | 0.048 |
| A_23_P152235  | NM_024336    | IRX3        | 64.779                  | 6.017          | 0.000   | 0.048 |
| A_23_P9135    | NM_033655    | CNTNAP3     | 64.505                  | 6.011          | 0.000   | 0.047 |
| A_24_P766716  | NM_001142343 | CMKLR1      | 60.880                  | 5.928          | 0.000   | 0.048 |
| A_33_P3414037 | NR_120661.1  | TSPAN14-AS1 | 60.316                  | 5.914          | 0.000   | 0.046 |
| A_33_P3363420 | NM_174938    | FRMD3       | 57.235                  | 5.839          | 0.000   | 0.047 |
| A_23_P348636  | NM_001454    | FOXJ1       | 56.110                  | 5.810          | 0.000   | 0.046 |
| A_33_P3240843 | NM_144649    | TMEM71      | 52.640                  | 5.718          | 0.000   | 0.046 |
| A_33_P3242883 | NM_005222    | DLX6        | 51.514                  | 5.687          | 0.000   | 0.046 |
| A_23_P121480  | NM_001004196 | CD200       | 48.324                  | 5.595          | 0.000   | 0.047 |
| A_23_P81676   | NM_198239    | WISP3       | 45.669                  | 5.513          | 0.000   | 0.046 |
| A_32_P140489  | NM_001001557 | GDF6        | 43.378                  | 5.439          | 0.000   | 0.047 |
| A_23_P161218  | NM_014391    | ANKRD1      | 42.128                  | 5.397          | 0.000   | 0.044 |
| A_23_P383986  | NM_015892    | CHST15      | 41.543                  | 5.377          | 0.000   | 0.027 |
| A_23_P86653   | NM_002727    | SRGN        | 40.781                  | 5.350          | 0.000   | 0.047 |
| A_23_P329573  | NM_000211    | ITGB2       | 38.339                  | 5.261          | 0.000   | 0.034 |
| A_23_P27013   | NM_024017    | HOXB9       | 38.259                  | 5.258          | 0.000   | 0.017 |
| A_23_P167129  | NM_022475    | HHIP        | 34.610                  | 5.113          | 0.000   | 0.046 |
| A_33_P3321382 |              |             | 33.819                  | 5.080          | 0.000   | 0.046 |
| A_33_P3249394 | NM_001129827 | CACNA1C     | 33.335                  | 5.059          | 0.001   | 0.045 |
| A_23_P92928   | NM_000065    | C6          | 32.503                  | 5.022          | 0.001   | 0.045 |
| A_23_P140384  | NM_001911    | CTSG        | 31.838                  | 4.993          | 0.001   | 0.045 |
| A_23_P423462  | NR_027245    | C18orf20    | 31.570                  | 4.980          | 0.001   | 0.045 |
| A_24_P928969  | NM_001145369 | PTPN3       | 31.422                  | 4.974          | 0.001   | 0.046 |
| A_33_P3385161 | XM_001715900 | EFCAB9      | 31.386                  | 4.972          | 0.000   | 0.043 |
| A_23_P69537   | NM_006681    | NMU         | 31.041                  | 4.956          | 0.000   | 0.042 |
| A_23_P323761  | NM_025228    | TRAF3IP3    | 30.251                  | 4.919          | 0.001   | 0.045 |
| A_23_P353149  | NM_178552    | C22orf33    | 29.228                  | 4.869          | 0.001   | 0.045 |
| A_33_P3363425 | XR_017002    | FRMD3       | 29.208                  | 4.868          | 0.000   | 0.046 |
| A_23_P125717  | NM_004538    | NAP1L3      | 29.190                  | 4.867          | 0.000   | 0.018 |
| A_33_P3220090 | NM_001076781 | ZNF391      | 28.990                  | 4.857          | 0.001   | 0.045 |
| A_33_P3300975 | NM_014620    | HOXC4       | 28.695                  | 4.843          | 0.000   | 0.046 |
| A_23_P217901  | NM_001113207 | TSTD1       | 28.688                  | 4.842          | 0.001   | 0.045 |
| A_24_P52697   | NR_002196    | H19         | 28.378                  | 4.827          | 0.001   | 0.045 |
| A_24_P280983  | NR_002795    | HOXA11AS    | 28.047                  | 4.810          | 0.000   | 0.029 |
| A_33_P3332937 | XM_001716126 | LOC650794   | 27.434                  | 4.778          | 0.000   | 0.047 |
| A_23_P42868   | NM_000596    | IGFBP1      | 27.378                  | 4.775          | 0.001   | 0.045 |
| A_23_P4714    | NM_006533    | MIA         | 26.919                  | 4.751          | 0.000   | 0.025 |

|               |                |              |        |       |       |       |
|---------------|----------------|--------------|--------|-------|-------|-------|
| A_23_P92334   | NM_024943      | TMEM156      | 25.624 | 4.679 | 0.001 | 0.045 |
| A_24_P106624  | NM_005924      | MEOX2        | 25.619 | 4.679 | 0.001 | 0.046 |
| A_33_P3291871 |                |              | 25.557 | 4.676 | 0.001 | 0.045 |
| A_33_P3215968 |                |              | 24.794 | 4.632 | 0.001 | 0.046 |
| A_23_P66635   | NM_002986      | CCL11        | 24.710 | 4.627 | 0.001 | 0.046 |
| A_23_P7965    | NM_002630      | PGC          | 24.673 | 4.625 | 0.000 | 0.036 |
| A_33_P3213082 | AK024093       | LOC101927770 | 24.275 | 4.601 | 0.000 | 0.023 |
| A_23_P403898  | NM_002829      | PTPN3        | 24.159 | 4.594 | 0.000 | 0.024 |
| A_23_P94319   | NM_014867      | KBTBD11      | 23.908 | 4.579 | 0.000 | 0.046 |
| A_33_P3307197 | NM_020440      | PTGFRN       | 23.432 | 4.550 | 0.000 | 0.025 |
| A_23_P423108  | NM_182499      | TDRD10       | 23.155 | 4.533 | 0.000 | 0.021 |
| A_33_P3255587 | AK056732       | LOC144817    | 23.142 | 4.532 | 0.001 | 0.046 |
| A_23_P5903    | NM_016354      | SLCO4A1      | 23.124 | 4.531 | 0.001 | 0.047 |
| A_33_P3441021 | NM_001136534   | TMEM233      | 22.959 | 4.521 | 0.000 | 0.032 |
| A_23_P300090  | NM_032128      | SLC10A7      | 22.378 | 4.484 | 0.001 | 0.048 |
| A_33_P3246418 | NM_005586      | MDFI         | 22.119 | 4.467 | 0.000 | 0.045 |
| A_24_P658427  | NM_005596      | NFIB         | 21.830 | 4.448 | 0.000 | 0.045 |
| A_23_P128362  | NM_206819      | MYBPC1       | 21.634 | 4.435 | 0.001 | 0.047 |
| A_33_P3345225 |                |              | 21.608 | 4.434 | 0.001 | 0.047 |
| A_33_P3260654 | BC028083       | TRBV5-4      | 21.526 | 4.428 | 0.000 | 0.046 |
| A_24_P220822  | NM_174952      | C4orf37      | 21.104 | 4.399 | 0.001 | 0.046 |
| A_33_P3394699 | AK127499       | LOC100129498 | 20.503 | 4.358 | 0.000 | 0.042 |
| A_24_P179467  | NM_005071      | SLC1A6       | 20.274 | 4.342 | 0.001 | 0.048 |
| A_33_P3221748 | NM_001031680   | RUNX3        | 20.207 | 4.337 | 0.000 | 0.046 |
| A_33_P3289121 | NM_032411      | C2orf40      | 20.177 | 4.335 | 0.000 | 0.039 |
| A_23_P143526  | NM_006272      | S100B        | 20.148 | 4.333 | 0.000 | 0.023 |
| A_33_P3215298 | XM_001715728   | ANKRD62      | 19.825 | 4.309 | 0.001 | 0.048 |
| A_33_P3613000 | NM_001105539   | ZBTB10       | 19.738 | 4.303 | 0.000 | 0.048 |
| A_33_P3271325 | NR_002790      | PER4         | 19.437 | 4.281 | 0.000 | 0.046 |
| A_33_P3216714 | NM_014787      | DNAJC6       | 19.435 | 4.281 | 0.000 | 0.046 |
| A_33_P3249982 | XR_001752012.1 | ABCC11       | 19.262 | 4.268 | 0.001 | 0.048 |
| A_23_P7727    | NM_001884      | HAPLN1       | 18.756 | 4.229 | 0.000 | 0.020 |
| A_24_P822931  | BC034811       | TRPC5OS      | 18.696 | 4.225 | 0.001 | 0.048 |
| A_33_P3406171 | NM_080832      | PABPC5       | 18.478 | 4.208 | 0.000 | 0.040 |
| A_23_P159974  | NM_033495      | KLHL13       | 18.428 | 4.204 | 0.000 | 0.035 |
| A_23_P38167   | NM_022036      | GPRC5C       | 18.264 | 4.191 | 0.000 | 0.046 |
| A_33_P3405728 | NM_004572      | PKP2         | 18.052 | 4.174 | 0.001 | 0.049 |
| A_23_P386254  | NM_001189      | NKX3-2       | 18.007 | 4.171 | 0.001 | 0.048 |
| A_32_P160045  | NM_152665      | TCTEX1D1     | 17.605 | 4.138 | 0.001 | 0.049 |
| A_23_P168847  | NM_172366      | FBXO16       | 17.459 | 4.126 | 0.000 | 0.023 |
| A_24_P929388  | NM_138390      | TMEM169      | 17.241 | 4.108 | 0.000 | 0.028 |
| A_23_P357207  | NM_138409      | MRAP2        | 17.226 | 4.106 | 0.001 | 0.049 |
| A_33_P3295203 | NM_001523      | HAS1         | 15.893 | 3.990 | 0.000 | 0.018 |
| A_23_P150609  | NM_000612      | IGF2         | 15.868 | 3.988 | 0.000 | 0.021 |
| A_33_P3214665 | NM_002374      | MAP2         | 15.715 | 3.974 | 0.001 | 0.045 |
| A_33_P3224780 | XM_011510659.2 | TMEM37       | 15.600 | 3.963 | 0.000 | 0.048 |
| A_23_P500998  | NM_152739      | HOXA9        | 15.449 | 3.949 | 0.000 | 0.046 |
| A_23_P258769  | NM_002121      | HLA-DPB1     | 15.398 | 3.945 | 0.000 | 0.046 |

|               |                |              |        |       |       |       |
|---------------|----------------|--------------|--------|-------|-------|-------|
| A_23_P421032  | NM_174977      | SEC14L4      | 15.348 | 3.940 | 0.001 | 0.047 |
| A_23_P63736   | NR_026827      | LOC84856     | 15.056 | 3.912 | 0.001 | 0.046 |
| A_33_P3424577 |                |              | 15.036 | 3.910 | 0.000 | 0.046 |
| A_24_P289383  | NM_017780      | CHD7         | 13.766 | 3.783 | 0.001 | 0.048 |
| A_23_P82324   | NM_032415      | CARD11       | 13.653 | 3.771 | 0.000 | 0.040 |
| A_32_P169406  | NR_026656      | LOC400043    | 13.556 | 3.761 | 0.000 | 0.021 |
| A_33_P3263432 | NM_003637      | ITGA10       | 13.486 | 3.753 | 0.000 | 0.046 |
| A_23_P40880   | NM_178868      | CMTM8        | 13.462 | 3.751 | 0.001 | 0.045 |
| A_33_P3275973 | NR_015365      | LOC553137    | 13.423 | 3.747 | 0.000 | 0.033 |
| A_23_P67453   | NM_000363      | TNNI3        | 13.401 | 3.744 | 0.000 | 0.048 |
| A_23_P113034  | NM_032024      | C10orf11     | 13.237 | 3.726 | 0.000 | 0.000 |
| A_23_P28466   | NM_178821      | WDR69        | 12.714 | 3.668 | 0.001 | 0.045 |
| A_32_P87013   | NM_000584      | IL8          | 12.473 | 3.641 | 0.000 | 0.034 |
| A_23_P216468  | NM_004170      | SLC1A1       | 12.385 | 3.631 | 0.001 | 0.045 |
| A_33_P3260377 | NM_031461      | CRISPLD1     | 12.373 | 3.629 | 0.000 | 0.046 |
| A_24_P88763   | NM_032603      | LOXL3        | 12.190 | 3.608 | 0.001 | 0.045 |
| A_23_P157736  | NM_032728      | PPAPDC3      | 11.836 | 3.565 | 0.001 | 0.045 |
| A_33_P3561747 | NM_001145545   | C16orf82     | 11.747 | 3.554 | 0.000 | 0.034 |
| A_33_P3408757 | NM_001291281.3 | FOXO6        | 11.743 | 3.554 | 0.000 | 0.027 |
| A_23_P129458  | NM_145168      | SDR42E1      | 11.668 | 3.544 | 0.000 | 0.021 |
| A_23_P391396  | NM_001005463   | EBF3         | 11.466 | 3.519 | 0.001 | 0.047 |
| A_33_P3275707 | NM_001039569   | AP1S3        | 11.435 | 3.515 | 0.001 | 0.046 |
| A_24_P664850  | NM_006011      | ST8SIA2      | 11.354 | 3.505 | 0.000 | 0.033 |
| A_23_P212042  | NM_005929      | MFI2         | 11.309 | 3.499 | 0.000 | 0.038 |
| A_23_P369328  | NM_145306      | C10orf35     | 11.303 | 3.499 | 0.001 | 0.045 |
| A_24_P270033  | AK095399       | MPZL3        | 11.055 | 3.467 | 0.001 | 0.045 |
| A_23_P28120   | NM_016932      | SIX2         | 10.926 | 3.450 | 0.001 | 0.048 |
| A_24_P166613  | NM_017549      | EPDR1        | 10.890 | 3.445 | 0.001 | 0.045 |
| A_32_P99347   | NR_024376      | C9orf110     | 10.884 | 3.444 | 0.001 | 0.050 |
| A_33_P3214343 | NM_001134478   | PLCXD2       | 10.639 | 3.411 | 0.000 | 0.039 |
| A_24_P48057   | NM_005853      | IRX5         | 10.509 | 3.394 | 0.001 | 0.045 |
| A_33_P3370875 |                |              | 10.492 | 3.391 | 0.000 | 0.024 |
| A_33_P3358208 | NM_013358      | PADI1        | 10.386 | 3.377 | 0.001 | 0.050 |
| A_32_P112623  | XR_079078      | LOC100293193 | 10.222 | 3.354 | 0.000 | 0.025 |
| A_33_P3276693 | NM_002632      | PGF          | 10.141 | 3.342 | 0.000 | 0.020 |
| A_33_P3273552 | NM_002282      | KRT83        | 10.094 | 3.335 | 0.001 | 0.045 |
| A_33_P3258627 |                |              | 9.968  | 3.317 | 0.000 | 0.042 |
| A_24_P158946  | NM_139241      | FGD4         | 9.940  | 3.313 | 0.001 | 0.045 |
| A_23_P56559   | NM_005771      | DHRS9        | 9.855  | 3.301 | 0.000 | 0.024 |
| A_32_P104063  | XR_042100      | CRNDE        | 9.776  | 3.289 | 0.000 | 0.042 |
| A_23_P259207  | NM_018271      | THNSL2       | 9.745  | 3.285 | 0.000 | 0.046 |
| A_33_P3263232 | NM_030891      | LRRC3        | 9.685  | 3.276 | 0.001 | 0.046 |
| A_23_P11685   | NM_024420      | PLA2G4A      | 9.588  | 3.261 | 0.001 | 0.048 |
| A_23_P32414   | NM_016542      | RP6-213H19.1 | 9.505  | 3.249 | 0.001 | 0.045 |
| A_33_P3227793 | NM_006569      | CGREF1       | 9.397  | 3.232 | 0.000 | 0.036 |
| A_23_P48109   | NM_016533      | NINJ2        | 9.307  | 3.218 | 0.001 | 0.048 |
| A_32_P115050  | XR_041422      | LOC646576    | 9.277  | 3.214 | 0.000 | 0.023 |
| A_23_P30243   | NM_022350      | ERAP2        | 9.255  | 3.210 | 0.001 | 0.045 |

|               |                |              |       |       |       |       |
|---------------|----------------|--------------|-------|-------|-------|-------|
| A_23_P369994  | NM_004734      | DCLK1        | 9.001 | 3.170 | 0.001 | 0.046 |
| A_33_P3409518 | NR_027156      | TUBBP5       | 8.936 | 3.160 | 0.001 | 0.045 |
| A_32_P170481  | NR_026658      | LOC100240735 | 8.799 | 3.137 | 0.001 | 0.045 |
| A_24_P56240   | NM_153634      | CPNE8        | 8.504 | 3.088 | 0.000 | 0.048 |
| A_33_P3287158 | NM_020742      | NLGN4X       | 8.437 | 3.077 | 0.000 | 0.048 |
| A_23_P421306  | NM_177963      | SYT12        | 8.414 | 3.073 | 0.001 | 0.049 |
| A_23_P88880   | NM_015069      | ZNF423       | 8.383 | 3.067 | 0.001 | 0.045 |
| A_23_P300150  | NM_172387      | NFATC1       | 8.346 | 3.061 | 0.001 | 0.045 |
| A_23_P20532   | AK024257       | LOC642406    | 8.232 | 3.041 | 0.000 | 0.024 |
| A_23_P145935  | NM_004445      | EPHB6        | 8.033 | 3.006 | 0.001 | 0.047 |
| A_33_P3398196 |                |              | 7.912 | 2.984 | 0.000 | 0.023 |
| A_23_P143935  | NM_025163      | PIGZ         | 7.699 | 2.945 | 0.001 | 0.046 |
| A_23_P115726  | NM_194298      | SLC16A9      | 7.386 | 2.885 | 0.000 | 0.000 |
| A_33_P3300965 | NM_153693      | HOXC6        | 7.267 | 2.861 | 0.001 | 0.046 |
| A_23_P87709   | NM_024829      | PLBD1        | 7.210 | 2.850 | 0.001 | 0.046 |
| A_23_P24129   | NM_012242      | DKK1         | 7.182 | 2.844 | 0.000 | 0.040 |
| A_32_P211248  | XM_001717925   | LOC100131138 | 7.167 | 2.841 | 0.001 | 0.048 |
| A_23_P162165  | NM_023930      | KCTD14       | 7.160 | 2.840 | 0.001 | 0.049 |
| A_23_P202269  | NM_020987      | ANK3         | 7.090 | 2.826 | 0.001 | 0.047 |
| A_23_P70968   | NM_006896      | HOXA7        | 7.020 | 2.812 | 0.001 | 0.047 |
| A_23_P30913   | NM_033554      | HLA-DPA1     | 6.980 | 2.803 | 0.001 | 0.046 |
| A_24_P49260   | NM_018327      | SPTLC3       | 6.920 | 2.791 | 0.001 | 0.047 |
| A_24_P306443  | NM_001033515   | LOC100132288 | 6.891 | 2.785 | 0.000 | 0.046 |
| A_23_P41390   | NM_018986      | SH3TC1       | 6.885 | 2.783 | 0.001 | 0.048 |
| A_24_P150466  | NM_001034852   | SMOC1        | 6.878 | 2.782 | 0.000 | 0.028 |
| A_33_P3227079 | XM_005272231.2 | PLPP7        | 6.846 | 2.775 | 0.001 | 0.048 |
| A_23_P208788  | NM_033520      | C19orf33     | 6.843 | 2.775 | 0.001 | 0.048 |
| A_33_P3209209 | XM_001132904   | LOC728694    | 6.782 | 2.762 | 0.001 | 0.045 |
| A_23_P323143  | NR_027788      | ZNF767       | 6.775 | 2.760 | 0.001 | 0.045 |
| A_33_P3297562 | NM_033267      | IRX2         | 6.666 | 2.737 | 0.001 | 0.047 |
| A_23_P78018   | NM_018672      | ABCA5        | 6.423 | 2.683 | 0.000 | 0.025 |
| A_33_P3381751 | NM_003253      | TIAM1        | 6.232 | 2.640 | 0.001 | 0.047 |
| A_24_P371628  | NM_054027      | ANKH         | 6.223 | 2.638 | 0.001 | 0.048 |
| A_32_P104746  | NM_020972      | ZFYVE28      | 6.156 | 2.622 | 0.001 | 0.048 |
| A_23_P421175  | NM_198488      | FAM83H       | 6.127 | 2.615 | 0.001 | 0.048 |
| A_24_P124558  | NM_022658      | HOXC8        | 5.869 | 2.553 | 0.001 | 0.048 |
| A_32_P4018    | AK000776       | ROR1         | 5.813 | 2.539 | 0.000 | 0.043 |
| A_23_P18372   | NM_032047      | B3GNT5       | 5.801 | 2.536 | 0.001 | 0.046 |
| A_23_P211345  | NM_080647      | TBX1         | 5.780 | 2.531 | 0.001 | 0.048 |
| A_32_P180265  | XM_002342916   | LOC100287241 | 5.774 | 2.529 | 0.001 | 0.048 |
| A_23_P159775  | NM_004961      | GABRE        | 5.738 | 2.520 | 0.000 | 0.025 |
| A_33_P3336617 | NM_000382      | ALDH3A2      | 5.730 | 2.519 | 0.000 | 0.033 |
| A_23_P413641  | NM_020820      | PREX1        | 5.727 | 2.518 | 0.000 | 0.038 |
| A_23_P146946  | NM_001323      | CST6         | 5.704 | 2.512 | 0.001 | 0.048 |
| A_23_P75283   | NM_006744      | RBP4         | 5.677 | 2.505 | 0.001 | 0.048 |
| A_23_P202206  | NM_183239      | GSTO2        | 5.567 | 2.477 | 0.001 | 0.048 |
| A_33_P3336622 | NM_001031806   | ALDH3A2      | 5.534 | 2.468 | 0.001 | 0.048 |
| A_33_P3311267 | NM_181608      | KRTAP19-2    | 5.532 | 2.468 | 0.001 | 0.048 |

|               |                |              |       |       |       |       |
|---------------|----------------|--------------|-------|-------|-------|-------|
| A_24_P238131  | NM_015551      | SUSD5        | 5.518 | 2.464 | 0.001 | 0.048 |
| A_23_P73429   | NM_005335      | HCLS1        | 5.385 | 2.429 | 0.000 | 0.025 |
| A_24_P342096  | NR_024060      | FAM27A       | 5.363 | 2.423 | 0.001 | 0.048 |
| A_32_P205110  | NM_001453      | FOXC1        | 5.240 | 2.390 | 0.001 | 0.048 |
| A_24_P342829  | NM_152527      | SLC16A14     | 5.237 | 2.389 | 0.000 | 0.045 |
| A_23_P259442  | NM_001873      | CPE          | 5.228 | 2.386 | 0.000 | 0.042 |
| A_33_P3370521 | XM_001723587   | LOC100133008 | 5.193 | 2.377 | 0.001 | 0.048 |
| A_23_P46470   | NM_018948      | ERRFI1       | 5.161 | 2.368 | 0.001 | 0.048 |
| A_32_P86763   | NM_004613      | TGM2         | 5.110 | 2.353 | 0.000 | 0.034 |
| A_33_P3377519 | NM_024014      | HOXA6        | 5.073 | 2.343 | 0.001 | 0.048 |
| A_23_P309619  | NM_001145206   | KIAA1671     | 5.029 | 2.330 | 0.000 | 0.046 |
| A_33_P3336257 | NM_024337      | IRX1         | 4.982 | 2.317 | 0.001 | 0.048 |
| A_23_P126075  | NM_002245      | KCNK1        | 4.951 | 2.308 | 0.001 | 0.048 |
| A_33_P3336686 | NM_004669      | CLIC3        | 4.742 | 2.245 | 0.001 | 0.049 |
| A_23_P218646  | NM_032945      | TNFRSF6B     | 4.680 | 2.227 | 0.000 | 0.039 |
| A_33_P3216438 | NM_198546      | SPATA21      | 4.668 | 2.223 | 0.000 | 0.029 |
| A_23_P433111  | NM_153706      | C5orf35      | 4.515 | 2.175 | 0.001 | 0.050 |
| A_32_P79483   | XM_001128325   | LOC283481    | 4.348 | 2.120 | 0.000 | 0.040 |
| A_23_P32036   | NM_017881      | C9orf95      | 4.251 | 2.088 | 0.000 | 0.029 |
| A_23_P5601    | NM_001381      | DOK1         | 4.245 | 2.086 | 0.000 | 0.048 |
| A_33_P3310929 | NM_003474      | ADAM12       | 4.167 | 2.059 | 0.000 | 0.037 |
| A_23_P120243  | NM_024501      | HOXD1        | 4.119 | 2.042 | 0.000 | 0.001 |
| A_23_P58588   | NM_003062      | SLIT3        | 4.049 | 2.018 | 0.001 | 0.048 |
| A_24_P109644  | XR_017002      | LOC220077    | 4.034 | 2.012 | 0.000 | 0.041 |
| A_23_P161439  | NM_006829      | C10orf116    | 3.965 | 1.987 | 0.000 | 0.038 |
| A_23_P69030   | NM_001850      | COL8A1       | 3.876 | 1.955 | 0.001 | 0.045 |
| A_24_P412734  | NM_173502      | PRSS36       | 3.833 | 1.939 | 0.001 | 0.048 |
| A_33_P3358601 | NM_001170820.4 | IFITM10      | 3.785 | 1.920 | 0.001 | 0.045 |
| A_23_P315364  | NM_002089      | CXCL2        | 3.713 | 1.893 | 0.001 | 0.049 |
| A_23_P72157   | NM_032219      | MFSD7        | 3.704 | 1.889 | 0.000 | 0.036 |
| A_23_P113462  | NM_017641      | KIF21A       | 3.697 | 1.886 | 0.000 | 0.028 |
| A_23_P502142  | NM_002037      | FYN          | 3.686 | 1.882 | 0.000 | 0.000 |
| A_32_P208120  | NM_153498      | CAMK1D       | 3.680 | 1.880 | 0.001 | 0.048 |
| A_23_P105524  | NM_033123      | PLCZ1        | 3.632 | 1.861 | 0.000 | 0.010 |
| A_23_P210164  | NM_019558      | HOXD8        | 3.610 | 1.852 | 0.001 | 0.047 |
| A_23_P96041   | NM_032227      | TMEM164      | 3.573 | 1.837 | 0.000 | 0.036 |
| A_23_P153676  | NM_003260      | TLE2         | 3.489 | 1.803 | 0.000 | 0.046 |
| A_23_P28434   | NM_003761      | VAMP8        | 3.366 | 1.751 | 0.000 | 0.046 |
| A_24_P104119  | NM_019034      | RHOF         | 3.312 | 1.728 | 0.001 | 0.048 |
| A_23_P151075  | NM_001175      | ARHGDIB      | 3.274 | 1.711 | 0.000 | 0.042 |
| A_23_P67847   | NM_024572      | GALNT14      | 3.222 | 1.688 | 0.000 | 0.048 |
| A_23_P359245  | NM_000245      | MET          | 3.143 | 1.652 | 0.000 | 0.000 |
| A_23_P316612  | NM_147193      | GLIS1        | 3.142 | 1.652 | 0.001 | 0.049 |
| A_23_P121527  | NM_015990      | KLHL5        | 3.138 | 1.650 | 0.000 | 0.000 |
| A_23_P10194   | NM_201575      | SEZ6L2       | 3.114 | 1.639 | 0.000 | 0.047 |
| A_24_P355649  | NM_002017      | FLI1         | 3.110 | 1.637 | 0.001 | 0.047 |
| A_33_P3420446 | NM_001161528   | LOC401387    | 3.021 | 1.595 | 0.001 | 0.046 |
| A_33_P3363305 |                |              | 3.020 | 1.594 | 0.001 | 0.045 |

|               |              |              |       |        |       |       |
|---------------|--------------|--------------|-------|--------|-------|-------|
| A_23_P353574  | NM_133494    | NEK7         | 2.996 | 1.583  | 0.001 | 0.048 |
| A_23_P101013  | NM_007267    | TMC6         | 2.977 | 1.574  | 0.000 | 0.000 |
| A_23_P382188  | NM_001013841 | STAP2        | 2.955 | 1.563  | 0.000 | 0.046 |
| A_32_P52785   | NM_015345    | DAAM2        | 2.953 | 1.562  | 0.000 | 0.047 |
| A_23_P419202  | NM_033160    | ZNF658       | 2.948 | 1.560  | 0.000 | 0.046 |
| A_32_P152437  | NM_005100    | AKAP12       | 2.931 | 1.551  | 0.001 | 0.045 |
| A_33_P3399755 |              |              | 2.927 | 1.549  | 0.000 | 0.046 |
| A_32_P150391  | NM_001105520 | C17orf100    | 2.915 | 1.543  | 0.001 | 0.048 |
| A_23_P102890  | NM_032476    | MRPS6        | 2.910 | 1.541  | 0.000 | 0.025 |
| A_24_P411749  | NM_020455    | GPR126       | 2.890 | 1.531  | 0.000 | 0.048 |
| A_23_P85682   | NM_005595    | NFIA         | 2.843 | 1.507  | 0.001 | 0.048 |
| A_23_P202117  | BC007377     | PCGF5        | 2.824 | 1.498  | 0.001 | 0.048 |
| A_24_P861009  | NM_001007246 | BRWD1        | 2.809 | 1.490  | 0.001 | 0.046 |
| A_33_P3296205 | NM_183422    | TSC22D1      | 2.803 | 1.487  | 0.000 | 0.047 |
| A_33_P3341105 | NM_002602    | PDE6G        | 2.770 | 1.470  | 0.000 | 0.047 |
| A_23_P51397   | NM_001008493 | ENAH         | 2.754 | 1.461  | 0.001 | 0.048 |
| A_33_P3382887 | XM_001714799 | hCG_1659830  | 2.750 | 1.459  | 0.000 | 0.048 |
| A_23_P120281  | NM_022336    | EDAR         | 2.745 | 1.457  | 0.000 | 0.042 |
| A_33_P3629678 | NM_000093    | COL5A1       | 2.711 | 1.439  | 0.001 | 0.045 |
| A_23_P143845  | NM_015508    | TIPARP       | 2.671 | 1.417  | 0.001 | 0.048 |
| A_23_P76983   | NM_025057    | C14orf45     | 2.662 | 1.412  | 0.001 | 0.048 |
| A_33_P3551349 | AK127450     | LOC439911    | 2.632 | 1.396  | 0.001 | 0.047 |
| A_24_P134392  | NM_006948    | HSPA13       | 2.586 | 1.371  | 0.001 | 0.046 |
| A_23_P101434  | NM_033297    | NLRP12       | 2.558 | 1.355  | 0.001 | 0.046 |
| A_24_P122337  | NM_080737    | SYTL4        | 2.533 | 1.341  | 0.001 | 0.046 |
| A_23_P254733  | NM_024629    | MLF1IP       | 2.495 | 1.319  | 0.001 | 0.048 |
| A_33_P3411632 | NM_025268    | TMEM121      | 2.475 | 1.307  | 0.001 | 0.045 |
| A_33_P3252359 | NM_203314    | BDH1         | 2.459 | 1.298  | 0.001 | 0.048 |
| A_24_P235266  | NM_001001555 | GRB10        | 2.453 | 1.295  | 0.001 | 0.048 |
| A_23_P40956   | NM_016362    | GHRL         | 2.453 | 1.295  | 0.000 | 0.044 |
| A_23_P119778  | NM_020342    | SLC39A10     | 2.352 | 1.234  | 0.000 | 0.000 |
| A_23_P401076  | NM_145006    | SUSD3        | 2.321 | 1.214  | 0.001 | 0.048 |
| A_23_P381714  | NM_198584    | CA13         | 2.314 | 1.210  | 0.001 | 0.049 |
| A_23_P38346   | NM_024119    | DHX58        | 2.313 | 1.210  | 0.001 | 0.048 |
| A_23_P119040  | NM_001142966 | GREB1L       | 2.207 | 1.142  | 0.001 | 0.045 |
| A_23_P120594  | NM_032501    | ACSS1        | 0.439 | -1.189 | 0.000 | 0.036 |
| A_33_P3263417 | NR_015431    | FLJ43663     | 0.421 | -1.248 | 0.001 | 0.048 |
| A_33_P3222367 | NR_002988    | SNORA74B     | 0.408 | -1.293 | 0.001 | 0.046 |
| A_24_P309095  | NM_005045    | RELN         | 0.395 | -1.340 | 0.001 | 0.049 |
| A_23_P121665  | NM_020777    | SORCS2       | 0.386 | -1.373 | 0.000 | 0.000 |
| A_33_P3212432 | XM_002346043 | LOC100293406 | 0.373 | -1.422 | 0.001 | 0.047 |
| A_23_P163455  | NM_002373    | MAP1A        | 0.368 | -1.442 | 0.001 | 0.045 |
| A_33_P3353791 | NM_181501    | ITGA1        | 0.364 | -1.459 | 0.001 | 0.045 |
| A_23_P8640    | NM_001039966 | GPBR         | 0.356 | -1.490 | 0.000 | 0.047 |
| A_23_P255331  | NM_032623    | C4orf49      | 0.351 | -1.511 | 0.000 | 0.047 |
| A_33_P3844650 | NM_012098    | ANGPTL2      | 0.347 | -1.527 | 0.001 | 0.048 |
| A_23_P64792   | NM_014505    | KCNMB4       | 0.346 | -1.531 | 0.000 | 0.046 |
| A_32_P86739   | NM_001010911 | C10orf114    | 0.343 | -1.543 | 0.000 | 0.046 |

|               |              |           |       |        |       |       |
|---------------|--------------|-----------|-------|--------|-------|-------|
| A_32_P78816   | NM_004577    | PSPH      | 0.342 | -1.546 | 0.000 | 0.046 |
| A_32_P167239  | NM_152406    | AFAP1L1   | 0.329 | -1.603 | 0.001 | 0.048 |
| A_33_P3413701 | NM_001040458 | ERAP1     | 0.328 | -1.607 | 0.000 | 0.046 |
| A_23_P70670   | NM_004233    | CD83      | 0.324 | -1.626 | 0.000 | 0.048 |
| A_23_P151805  | NM_006329    | FBLN5     | 0.321 | -1.640 | 0.000 | 0.043 |
| A_23_P47034   | NM_002729    | HHEX      | 0.315 | -1.668 | 0.000 | 0.046 |
| A_33_P3223495 |              |           | 0.305 | -1.712 | 0.001 | 0.048 |
| A_23_P74887   | NM_014654    | SDC3      | 0.305 | -1.715 | 0.000 | 0.044 |
| A_33_P3255209 | NR_024275    | LOC151162 | 0.299 | -1.742 | 0.000 | 0.048 |
| A_33_P3334443 | NM_001006605 | FAM69A    | 0.295 | -1.762 | 0.000 | 0.042 |
| A_24_P6903    | NM_001017992 | ACTBL2    | 0.295 | -1.763 | 0.000 | 0.044 |
| A_24_P11315   | NM_020190    | OLFML3    | 0.294 | -1.766 | 0.000 | 0.046 |
| A_33_P3262191 | NM_014427    | CPNE7     | 0.291 | -1.782 | 0.000 | 0.044 |
| A_33_P3334448 | NR_002324    | SNORA62   | 0.290 | -1.784 | 0.000 | 0.046 |
| A_23_P101374  | NM_030622    | CYP2S1    | 0.283 | -1.820 | 0.000 | 0.036 |
| A_33_P3337485 | NM_020404    | CD248     | 0.275 | -1.864 | 0.000 | 0.038 |
| A_23_P42306   | NM_006120    | HLA-DMA   | 0.273 | -1.871 | 0.001 | 0.049 |
| A_23_P66017   | NM_145239    | PRRT2     | 0.273 | -1.874 | 0.001 | 0.045 |
| A_33_P3376095 | NM_001040709 | SYPL2     | 0.272 | -1.878 | 0.000 | 0.046 |
| A_24_P8220    | NM_004807    | HS6ST1    | 0.267 | -1.903 | 0.000 | 0.039 |
| A_33_P3332081 | NM_006558    | KHDRBS3   | 0.260 | -1.942 | 0.000 | 0.040 |
| A_33_P3344282 |              |           | 0.260 | -1.942 | 0.000 | 0.038 |
| A_33_P3278362 | NM_020349    | ANKRD2    | 0.260 | -1.946 | 0.000 | 0.037 |
| A_32_P189790  | NR_027134    | LINC02716 | 0.258 | -1.956 | 0.000 | 0.046 |
| A_23_P105562  | NM_000552    | VWF       | 0.256 | -1.969 | 0.001 | 0.049 |
| A_33_P3417195 | NM_203425    | C17orf82  | 0.255 | -1.973 | 0.001 | 0.045 |
| A_24_P215653  | NM_175060    | CLEC14A   | 0.252 | -1.987 | 0.000 | 0.046 |
| A_23_P16743   | NM_002410    | MGAT5     | 0.252 | -1.988 | 0.000 | 0.048 |
| A_33_P3257861 | NM_001134707 | SARDH     | 0.248 | -2.010 | 0.001 | 0.048 |
| A_24_P254949  | NM_021965    | PGM5      | 0.230 | -2.119 | 0.000 | 0.032 |
| A_23_P43276   | NM_032777    | GPR124    | 0.220 | -2.185 | 0.000 | 0.047 |
| A_33_P3245126 | NM_182757.4  | RNF144B   | 0.219 | -2.193 | 0.001 | 0.045 |
| A_33_P3393821 | NM_001733    | C1R       | 0.218 | -2.195 | 0.000 | 0.036 |
| A_24_P896205  | XM_944447    | LOC645722 | 0.213 | -2.234 | 0.001 | 0.050 |
| A_33_P3323718 | NM_001008224 | UACA      | 0.207 | -2.272 | 0.001 | 0.050 |
| A_23_P71328   | NM_030583    | MATN2     | 0.195 | -2.356 | 0.001 | 0.049 |
| A_23_P257043  | NM_005261    | GEM       | 0.195 | -2.361 | 0.000 | 0.042 |
| A_23_P34233   | NM_014298    | QPRT      | 0.195 | -2.361 | 0.001 | 0.047 |
| A_33_P3271276 | NM_001130014 | PSG5      | 0.193 | -2.374 | 0.000 | 0.046 |
| A_23_P145606  | NM_001006630 | CHRM2     | 0.191 | -2.386 | 0.000 | 0.048 |
| A_23_P350005  | NM_173553    | TRIML2    | 0.191 | -2.390 | 0.001 | 0.048 |
| A_33_P3275846 | NM_001127222 | CACNA1A   | 0.190 | -2.395 | 0.000 | 0.027 |
| A_23_P394395  | NM_020433    | JPH2      | 0.187 | -2.417 | 0.000 | 0.037 |
| A_23_P127911  | NM_015430    | PAMR1     | 0.186 | -2.424 | 0.001 | 0.048 |
| A_23_P50946   | NM_005855    | RAMP1     | 0.186 | -2.426 | 0.001 | 0.048 |
| A_32_P112493  | NM_138370    | SGK493    | 0.184 | -2.443 | 0.001 | 0.048 |
| A_23_P143817  | NM_053025    | MYLK      | 0.183 | -2.448 | 0.001 | 0.048 |
| A_23_P205177  | NM_000504    | F10       | 0.181 | -2.462 | 0.001 | 0.049 |



|               |              |              |       |        |       |       |
|---------------|--------------|--------------|-------|--------|-------|-------|
| A_23_P500614  | NM_001243    | TNFRSF8      | 0.180 | -2.473 | 0.000 | 0.039 |
| A_24_P75190   | NM_000519    | HBD          | 0.180 | -2.474 | 0.000 | 0.025 |
| A_23_P3552    | BC009198     | LOC730092    | 0.180 | -2.474 | 0.001 | 0.048 |
| A_23_P82929   | NM_002514    | NOV          | 0.180 | -2.474 | 0.001 | 0.048 |
| A_23_P134854  | NM_194284    | CLDN23       | 0.179 | -2.485 | 0.001 | 0.048 |
| A_23_P200710  | NM_002646    | PIK3C2B      | 0.175 | -2.512 | 0.001 | 0.048 |
| A_33_P3395605 | NM_181724    | TMEM119      | 0.175 | -2.514 | 0.001 | 0.048 |
| A_23_P205713  | NM_014178    | STXBP6       | 0.174 | -2.526 | 0.001 | 0.048 |
| A_23_P217917  | NM_147148    | GSTM4        | 0.170 | -2.558 | 0.001 | 0.048 |
| A_33_P3276718 | NM_001010934 | HGF          | 0.165 | -2.596 | 0.001 | 0.048 |
| A_24_P3005    | NM_002977    | SCN9A        | 0.162 | -2.623 | 0.001 | 0.048 |
| A_23_P400515  | NM_020816    | KIF17        | 0.162 | -2.628 | 0.000 | 0.024 |
| A_33_P3402329 | NR_024607    | MGC16121     | 0.161 | -2.637 | 0.001 | 0.048 |
| A_24_P319736  | NM_002398    | MEIS1        | 0.161 | -2.638 | 0.001 | 0.048 |
| A_23_P75800   | NM_013401    | RAB3IL1      | 0.158 | -2.663 | 0.001 | 0.048 |
| A_23_P256205  | NM_014945    | ABLIM3       | 0.150 | -2.737 | 0.001 | 0.047 |
| A_23_P78795   | NM_001009813 | MEIS3        | 0.149 | -2.744 | 0.001 | 0.049 |
| A_23_P307392  | AK024141     | DPF3         | 0.144 | -2.799 | 0.000 | 0.037 |
| A_33_P3413468 | NM_021783    | EDA2R        | 0.144 | -2.801 | 0.001 | 0.048 |
| A_23_P349966  | NM_152913    | TMEM130      | 0.143 | -2.804 | 0.000 | 0.031 |
| A_23_P399255  | NM_152737    | RNF182       | 0.143 | -2.809 | 0.000 | 0.038 |
| A_33_P3276713 | NM_001010931 | HGF          | 0.141 | -2.823 | 0.001 | 0.047 |
| A_23_P432573  | NM_145015    | MRGPRF       | 0.140 | -2.837 | 0.000 | 0.023 |
| A_23_P29953   | NM_172174    | IL15         | 0.139 | -2.850 | 0.000 | 0.024 |
| A_33_P3363560 | NM_001136216 | TMEM51       | 0.139 | -2.851 | 0.000 | 0.047 |
| A_23_P53193   | NM_206927    | SYTL2        | 0.137 | -2.867 | 0.000 | 0.024 |
| A_23_P216307  | NM_004349    | RUNX1T1      | 0.137 | -2.870 | 0.001 | 0.047 |
| A_24_P709377  | NR_015377    | LOC654433    | 0.135 | -2.885 | 0.001 | 0.047 |
| A_23_P112482  | NM_004925    | AQP3         | 0.135 | -2.889 | 0.000 | 0.000 |
| A_23_P110430  | NM_002448    | MSX1         | 0.131 | -2.929 | 0.000 | 0.000 |
| A_32_P74409   | NM_001145033 | LOC387763    | 0.128 | -2.960 | 0.000 | 0.045 |
| A_33_P3418541 |              |              | 0.128 | -2.964 | 0.000 | 0.046 |
| A_33_P3315375 | NM_001104587 | SLFN11       | 0.124 | -3.011 | 0.001 | 0.046 |
| A_32_P160561  | NM_152721    | DOK6         | 0.124 | -3.015 | 0.001 | 0.047 |
| A_33_P3342967 | XR_078986    | LOC100129186 | 0.123 | -3.028 | 0.001 | 0.047 |
| A_32_P57810   | NM_052916    | RNF157       | 0.120 | -3.060 | 0.000 | 0.040 |
| A_33_P3234020 | NM_004884    | IGDCC3       | 0.119 | -3.075 | 0.000 | 0.040 |
| A_23_P258136  | NM_015419    | MXRA5        | 0.118 | -3.088 | 0.000 | 0.022 |
| A_23_P361085  | NR_003038    | SNHG5        | 0.116 | -3.113 | 0.001 | 0.045 |
| A_23_P301855  | NM_002338    | LSAMP        | 0.115 | -3.118 | 0.001 | 0.048 |
| A_24_P328524  | NM_003947    | KALRN        | 0.113 | -3.143 | 0.000 | 0.044 |
| A_23_P408376  | NM_025015    | HSPA12A      | 0.110 | -3.178 | 0.000 | 0.024 |
| A_23_P69326   | NM_183393    | CADPS        | 0.109 | -3.192 | 0.000 | 0.038 |
| A_24_P128442  | NM_152380    | TBX15        | 0.109 | -3.201 | 0.000 | 0.046 |
| A_23_P373521  | NM_021973    | HAND2        | 0.109 | -3.202 | 0.001 | 0.049 |
| A_23_P145054  | NM_001085480 | FAM162B      | 0.107 | -3.218 | 0.001 | 0.045 |
| A_33_P3378514 | NM_001083    | PDE5A        | 0.103 | -3.284 | 0.000 | 0.025 |
| A_23_P91943   | NM_000882    | IL12A        | 0.100 | -3.315 | 0.000 | 0.047 |

|               |              |              |       |        |       |       |
|---------------|--------------|--------------|-------|--------|-------|-------|
| A_24_P71649   | NM_020872    | CNTN3        | 0.099 | -3.340 | 0.001 | 0.045 |
| A_33_P3825869 | NM_199460    | CACNA1C      | 0.098 | -3.345 | 0.000 | 0.024 |
| A_23_P49816   | NM_018404    | ADAP2        | 0.097 | -3.365 | 0.001 | 0.045 |
| A_23_P40295   | NM_012261    | C20orf103    | 0.096 | -3.380 | 0.000 | 0.036 |
| A_33_P3424062 | NM_002236    | KCNF1        | 0.093 | -3.428 | 0.001 | 0.045 |
| A_23_P164451  | NM_005994    | TBX2         | 0.091 | -3.465 | 0.000 | 0.019 |
| A_33_P3238415 | NM_001080554 | GSG1         | 0.090 | -3.479 | 0.001 | 0.045 |
| A_23_P216966  | NM_000962    | PTGS1        | 0.087 | -3.516 | 0.000 | 0.019 |
| A_24_P892472  | NR_002791    | EMX2OS       | 0.077 | -3.701 | 0.000 | 0.040 |
| A_33_P3351298 |              |              | 0.077 | -3.702 | 0.001 | 0.045 |
| A_23_P252082  | NM_018487    | TMEM176A     | 0.074 | -3.748 | 0.001 | 0.045 |
| A_33_P3302125 | NM_178428    | LCE2A        | 0.074 | -3.751 | 0.001 | 0.045 |
| A_33_P3325723 | NM_001822    | CHN1         | 0.074 | -3.755 | 0.000 | 0.039 |
| A_23_P139864  | NM_031289    | GSG1         | 0.073 | -3.769 | 0.001 | 0.045 |
| A_23_P159237  | NM_005293    | GPR20        | 0.073 | -3.773 | 0.000 | 0.020 |
| A_33_P3850216 | NM_033058    | TRIM55       | 0.073 | -3.775 | 0.001 | 0.048 |
| A_23_P328074  | NM_002968    | SALL1        | 0.073 | -3.776 | 0.001 | 0.047 |
| A_33_P3343442 | XR_078693    | ZNF316       | 0.071 | -3.819 | 0.001 | 0.045 |
| A_32_P101917  |              | LOC283904    | 0.069 | -3.849 | 0.001 | 0.045 |
| A_23_P51019   | NM_021007    | SCN2A        | 0.069 | -3.856 | 0.001 | 0.048 |
| A_23_P208866  | NM_004877    | GMFG         | 0.065 | -3.933 | 0.000 | 0.021 |
| A_33_P3587376 | NR_024214    | SNAR-A3      | 0.065 | -3.950 | 0.001 | 0.046 |
| A_33_P3287223 | NM_001935    | DPP4         | 0.062 | -4.003 | 0.000 | 0.046 |
| A_33_P3329043 | XM_001724293 | LOC100133889 | 0.062 | -4.005 | 0.000 | 0.033 |
| A_33_P3315134 | NR_026597    | DIRC3        | 0.061 | -4.036 | 0.001 | 0.049 |
| A_23_P74609   | NM_015714    | G0S2         | 0.059 | -4.088 | 0.000 | 0.046 |
| A_33_P3347291 | NM_006774    | INMT         | 0.058 | -4.100 | 0.000 | 0.046 |
| A_23_P215744  | NM_033427    | CTTNBP2      | 0.058 | -4.107 | 0.001 | 0.046 |
| A_23_P97402   | NM_020439    | CAMK1G       | 0.058 | -4.119 | 0.000 | 0.028 |
| A_23_P91283   | NM_020356    | CASS4        | 0.057 | -4.131 | 0.000 | 0.027 |
| A_33_P3387646 | BC052945     | LOC643201    | 0.055 | -4.190 | 0.000 | 0.048 |
| A_23_P56703   | NM_001080824 | C2orf89      | 0.050 | -4.313 | 0.000 | 0.041 |
| A_23_P500353  | NM_021614    | KCNN2        | 0.048 | -4.370 | 0.000 | 0.046 |
| A_23_P39955   | NM_001615    | ACTG2        | 0.048 | -4.384 | 0.000 | 0.028 |
| A_33_P3314176 | NM_017709    | FAM46C       | 0.046 | -4.428 | 0.000 | 0.046 |
| A_23_P110957  | NM_001452    | FOXF2        | 0.046 | -4.450 | 0.000 | 0.000 |
| A_23_P374844  | NM_015973    | GAL          | 0.043 | -4.554 | 0.001 | 0.047 |
| A_24_P192805  | NM_001007232 | CARD17       | 0.040 | -4.651 | 0.000 | 0.046 |
| A_23_P304897  | NM_000623    | BDKRB2       | 0.040 | -4.652 | 0.000 | 0.045 |
| A_33_P3290532 | AK091766     | LOC255480    | 0.040 | -4.657 | 0.001 | 0.045 |
| A_33_P3316786 | NM_080759    | DACH1        | 0.039 | -4.669 | 0.001 | 0.045 |
| A_23_P64173   | NM_001017534 | CARD16       | 0.037 | -4.738 | 0.000 | 0.024 |
| A_23_P44264   | NM_004098    | EMX2         | 0.037 | -4.751 | 0.001 | 0.045 |
| A_23_P63521   | NM_178429    | LCE2C        | 0.036 | -4.790 | 0.001 | 0.047 |
| A_32_P169179  | NR_002307    | MSX2P1       | 0.036 | -4.798 | 0.001 | 0.046 |
| A_23_P400449  | NM_020927    | VAT1L        | 0.035 | -4.826 | 0.000 | 0.018 |
| A_23_P121533  | NM_012445    | SPON2        | 0.032 | -4.960 | 0.000 | 0.000 |
| A_33_P3240328 | NM_002653    | PITX1        | 0.029 | -5.127 | 0.000 | 0.046 |

|               |           |          |       |        |       |       |
|---------------|-----------|----------|-------|--------|-------|-------|
| A_23_P157007  | NM_014020 | TMEM176B | 0.029 | -5.132 | 0.000 | 0.046 |
| A_23_P133386  | NM_006909 | RASGRF2  | 0.028 | -5.179 | 0.001 | 0.045 |
| A_23_P128744  | NM_000710 | BDKRB1   | 0.026 | -5.269 | 0.000 | 0.046 |
| A_33_P3357002 | NM_178540 | C1QTNF9  | 0.025 | -5.313 | 0.001 | 0.046 |
| A_33_P3396831 |           |          | 0.025 | -5.322 | 0.000 | 0.019 |
| A_23_P31755   | NM_000756 | CRH      | 0.023 | -5.437 | 0.001 | 0.046 |
| A_23_P431268  | NM_014935 | PLEKHA6  | 0.021 | -5.540 | 0.000 | 0.046 |
| A_33_P3238290 | NM_080829 | FAM65C   | 0.021 | -5.547 | 0.000 | 0.046 |
| A_23_P103601  | NM_020379 | MAN1C1   | 0.021 | -5.603 | 0.000 | 0.046 |
| A_23_P72770   | NM_032147 | USP44    | 0.019 | -5.743 | 0.000 | 0.046 |
| A_24_P102293  | NM_015567 | SLITRK5  | 0.018 | -5.776 | 0.000 | 0.046 |
| A_23_P126836  | NM_003326 | TNFSF4   | 0.017 | -5.849 | 0.000 | 0.047 |
| A_23_P134237  | NM_002889 | RARRES2  | 0.015 | -6.093 | 0.000 | 0.010 |
| A_24_P30557   | NM_000192 | TBX5     | 0.010 | -6.608 | 0.000 | 0.046 |
| A_23_P409093  | NM_178826 | ANO4     | 0.010 | -6.644 | 0.000 | 0.015 |
| A_23_P118254  | NM_001451 | FOXF1    | 0.010 | -6.644 | 0.000 | 0.000 |

---

**Supplementary Table S3. List of enriched biological processes with genes up-regulated more than two folds in hBMSC against hEF and FDR<0.05.**

| GO Term #  | Term Description                                | Strength | FDR    | Matching Proteins                                                         |
|------------|-------------------------------------------------|----------|--------|---------------------------------------------------------------------------|
| Cluster 1  |                                                 |          |        |                                                                           |
| GO:0060325 | Face morphogenesis                              | 1.39     | 0.0338 | DLX5,CRISPLD1,TBX1,DKK1                                                   |
| GO:0009954 | Proximal/distal pattern formation               | 1.36     | 0.0399 | IRX1,HOXB9,IRX3,HOXA9                                                     |
| GO:0060324 | Face development                                | 1.30     | 0.0092 | DLX5,CRISPLD1,TBX1,DKK1,CHD7                                              |
| GO:0048704 | Embryonic skeletal system morphogenesis         | 1.25     | 0.0000 | HOXA6,MDFI,HOXA7,SIX2,HOXB9,TBX1,HOXA9,IRX5,HOXC4                         |
| GO:0048706 | Embryonic skeletal system development           | 1.21     | 0.0000 | HOXA6,MDFI,HOXA7,HOXC6,SIX2,HOXB9,TBX1,HOXA9,NKX3-2,IRX5,HOXC4            |
| GO:0060415 | Muscle tissue morphogenesis                     | 1.10     | 0.0497 | TBX1,TNNI3,ANKRD1,FOXC1,CHD7                                              |
| GO:0009952 | Anterior/posterior pattern specification        | 1.03     | 0.0000 | HOXC8,HOXA6,HOXA7,HOXC6,MEOX2,SIX2,HOXB9,TBX1,HOXA9,DKK1,FOXC1,HOXC4      |
| GO:0048705 | Skeletal system morphogenesis                   | 1.01     | 0.0000 | HOXC8,DLX5,HOXA6,MDFI,HOXA7,SIX2,HOXB9,TBX1,HOXA9,FOXC1,NKX3-2,IRX5,HOXC4 |
| Cluster 2  |                                                 |          |        |                                                                           |
| GO:0032715 | Negative regulation of interleukin-6 production | 1.29     | 0.0082 | FOXJ1,GHRL,TLR4,NLRP12,CD200                                              |
| GO:0030593 | Neutrophil chemotaxis                           | 1.06     | 0.0356 | CCL11,CXCL8,PREX1,ITGB2,CXCL2                                             |
| GO:0050709 | Negative regulation of protein secretion        | 1.02     | 0.0475 | SRGN,GHRL,SYTL4,NLRP12,CD200                                              |

\* The biological processes were identified by String analysis at <https://string-db.org/>. Two-cluster K-means clustering was applied here. Results shown are biological processes with enrichment strength >1 (log(enrichment)).

**Supplementary Table S4. List of enriched biological processes with genes down-regulated more than two folds in hBMSC against hEF and FDR<0.05.**

| GO Term #            | Term Description                           | Strength    | FDR           | Matching Proteins                               |
|----------------------|--------------------------------------------|-------------|---------------|-------------------------------------------------|
| Cluster 1            |                                            |             |               |                                                 |
| <i>KEGG_hsa04610</i> | <i>Complement and coagulation cascades</i> | <i>1.19</i> | <i>0.0106</i> | <i>BDKRB1,VWF,F10,C1R,BDKRB2</i>                |
| Cluster 2            |                                            |             |               |                                                 |
| <i>GO:0003197</i>    | <i>Endocardial cushion development</i>     | <i>1.41</i> | <i>0.0397</i> | <i>TBX2,FOXF1,TBX5,MSX1</i>                     |
| <i>GO:0030326</i>    | <i>Embryonic limb morphogenesis</i>        | <i>1.19</i> | <i>0.0078</i> | <i>TBX2,SALL1,PITX1,CACNA1C,TBX5,HAND2,MSX1</i> |
| <i>GO:0001508</i>    | <i>Action potential</i>                    | <i>1.16</i> | <i>0.0432</i> | <i>KCNMB4,CACNA1C,SCN2A,SCN9A,KCNN2</i>         |

\* The biological processes were identified by String analysis at <https://string-db.org/>. Two-cluster K-means clustering was applied here. Results shown are biological processes with enrichment strength >1 (log(enrichment)).

**Supplementary Table S5. List of enriched biological processes with transcription factors differentially expressed more than 2 folds between hBMSC and hEF and FDR<0.05.**

| GO Term #  | Term Description                                                     | Strength | FDR    | Matching Proteins                                                                     |
|------------|----------------------------------------------------------------------|----------|--------|---------------------------------------------------------------------------------------|
| Cluster 1  |                                                                      |          |        |                                                                                       |
| GO:0010944 | Negative regulation of transcription by competitive promoter binding | 2.19     | 0.0226 | HHEX,DACH1                                                                            |
| GO:0060044 | Negative regulation of cardiac muscle cell proliferation             | 2.05     | 0.0384 | MEIS1,TBX5                                                                            |
| GO:0035855 | Megakaryocyte development                                            | 2.00     | 0.0470 | MEIS1,FLI1                                                                            |
| GO:0060216 | Definitive hemopoiesis                                               | 2.00     | 0.0470 | MEIS1,HOXA9                                                                           |
| GO:0048706 | <i>Embryonic skeletal system development</i>                         | 1.72     | 0.0000 | TBX15,HOXA6,HOXA7,HOXC6,HOXB9,HOXD1,HOXA9,HOXC4                                       |
| GO:0048704 | <i>Embryonic skeletal system morphogenesis</i>                       | 1.72     | 0.0000 | TBX15,HOXA6,HOXA7,HOXB9,HOXA9,HOXC4                                                   |
| GO:0009952 | <i>Anterior/posterior pattern specification</i>                      | 1.60     | 0.0000 | HOXC8,HOXA6,HOXA7,HOXC6,HHEX,HOXB9,HOXD8,HOXA9,HOXC4,EMX2                             |
| GO:0003002 | Regionalization                                                      | 1.45     | 0.0000 | HOXC8,HOXA6,HOXA7,HOXC6,HHEX,HOXB9,HOXD8,FOXJ1,HOXA9,HOXC4,EMX2                       |
| GO:0048705 | Skeletal system morphogenesis                                        | 1.45     | 0.0000 | HOXC8,TBX15,HOXA6,HOXA7,HOXB9,HOXD8,HOXA9,HOXC4                                       |
| GO:1903707 | Negative regulation of hemopoiesis                                   | 1.44     | 0.0003 | HOXA7,MEIS1,FOXJ1,HOXA9,RUNX3                                                         |
| GO:0045638 | Negative regulation of myeloid cell differentiation                  | 1.42     | 0.0453 | HOXA7,MEIS1,HOXA9                                                                     |
| GO:0007389 | Pattern specification process                                        | 1.41     | 0.0000 | HOXC8,HOXA6,HOXA7,HOXC6,MEIS1,HHEX,HOXB9,TBX5,HOXD8,FOXJ1,HOXA9,HOXC4,EMX2            |
| GO:0001501 | Skeletal system development                                          | 1.35     | 0.0000 | HOXC8,TBX15,HOXA6,HOXA7,HOXC6,MEIS1,HOXB9,HOXD8,HOXD1,HOXA9,RUNX3,HOXC4,FLI1          |
| GO:0048562 | Embryonic organ morphogenesis                                        | 1.30     | 0.0000 | TBX15,HOXA6,HOXA7,FOXF2,HOXB9,HOXA9,HOXC4                                             |
| GO:0009887 | Animal organ morphogenesis                                           | 1.12     | 0.0000 | HOXC8,TBX15,HOXA6,HOXA7,FOXF2,MEIS1,HOXB9,TBX5,HOXD8,FOXJ1,HOXA9,HOXC4,FLI1,EMX2,TLE2 |
| GO:0048598 | Embryonic morphogenesis                                              | 1.08     | 0.0001 | TBX15,HOXA6,HOXA7,FOXF2,HOXB9,TBX5,HOXA9,HOXC4                                        |
| GO:0000122 | Negative regulation of                                               | 1.02     | 0.0000 | HOXC8,TBX15,HOXA7,H                                                                   |

|            |                                       |      |        |                                                                                    |
|------------|---------------------------------------|------|--------|------------------------------------------------------------------------------------|
|            | transcription by rna<br>polymerase ii |      |        | HEX,GLIS1,TBX5,HOXD<br>8,FOXF1,RUNX3,EMX2,D<br>ACH1                                |
| GO:0009790 | Embryo development                    | 1.01 | 0.0000 | TBX15,HOXA6,HOXA7,H<br>OXC6,FOXF2,MEIS1,HO<br>XB9,TBX5,HOXD8,HOX<br>D1,HOXA9,HOXC4 |

---

Cluster 2

---

|            |                                                                                                |      |        |                                          |
|------------|------------------------------------------------------------------------------------------------|------|--------|------------------------------------------|
| GO:0072086 | Specification of loop of henle<br>identity                                                     | 2.68 | 0.0022 | IRX1,IRX3                                |
| GO:0003337 | Mesenchymal to epithelial<br>transition involved in<br>metanephros morphogenesis               | 2.26 | 0.0082 | SALL1,SIX2                               |
| GO:0042473 | Outer ear morphogenesis                                                                        | 2.21 | 0.0098 | SALL1,TBX1                               |
| GO:0060982 | Coronary artery<br>morphogenesis                                                               | 2.21 | 0.0098 | TBX1,HAND2                               |
| GO:0010463 | Mesenchymal cell proliferation                                                                 | 2.13 | 0.0003 | SIX2,HAND2,MSX1                          |
| GO:0007379 | Segment specification                                                                          | 2.11 | 0.0004 | MEOX2,IRX1,IRX3                          |
| GO:0021889 | Olfactory bulb interneuron<br>differentiation                                                  | 2.08 | 0.0146 | DLX5,SALL1                               |
| GO:2001053 | Regulation of mesenchymal<br>cell apoptotic process                                            | 2.08 | 0.0146 | TBX1,MSX1                                |
| GO:0042474 | Middle ear morphogenesis                                                                       | 2.04 | 0.0006 | SIX2,TBX1,MSX1                           |
| GO:0042693 | Muscle cell fate commitment                                                                    | 1.99 | 0.0200 | TBX2,TBX1                                |
| GO:0043517 | Positive regulation of dna<br>damage response, signal<br>transduction by p53 class<br>mediator | 1.96 | 0.0222 | ANKRD1,MSX1                              |
| GO:0072189 | Ureter development                                                                             | 1.93 | 0.0244 | FOXF1,NFIA                               |
| GO:0048557 | Embryonic digestive tract<br>morphogenesis                                                     | 1.91 | 0.0269 | FOXF1,SIX2                               |
| GO:0060325 | Face morphogenesis                                                                             | 1.85 | 0.0017 | DLX5,TBX1,MSX1                           |
| GO:0072210 | Metanephric nephron<br>development                                                             | 1.85 | 0.0017 | SALL1,SIX2,IRX1                          |
| GO:0010464 | Regulation of mesenchymal<br>cell proliferation                                                | 1.82 | 0.0021 | FOXF1,TBX1,NFIB                          |
| GO:0001945 | Lymph vessel development                                                                       | 1.82 | 0.0375 | TBX1,FOXC1                               |
| GO:0048566 | Embryonic digestive tract<br>development                                                       | 1.81 | 0.0022 | SALL1,FOXF1,SIX2                         |
| GO:0110111 | Negative regulation of animal<br>organ morphogenesis                                           | 1.81 | 0.0022 | TBX2,FOXC1,NFIB                          |
| GO:0043586 | Tongue development                                                                             | 1.80 | 0.0403 | TBX1,HAND2                               |
| GO:0048844 | Artery morphogenesis                                                                           | 1.77 | 0.0000 | TBX2,FOXF1,TBX1,HAN<br>D2,FOXC1          |
| GO:0072132 | Mesenchyme morphogenesis                                                                       | 1.77 | 0.0001 | TBX2,FOXF1,FOXC1,MS<br>X1                |
| GO:0002053 | Positive regulation of<br>mesenchymal cell proliferation                                       | 1.76 | 0.0464 | FOXF1,TBX1                               |
| GO:0060021 | Roof of mouth development                                                                      | 1.75 | 0.0000 | DLX5,TBX2,MEOX2,TBX<br>1,HAND2,MSX1,DLX6 |

|            |                                                           |      |        |                                             |
|------------|-----------------------------------------------------------|------|--------|---------------------------------------------|
| GO:0048333 | Mesodermal cell differentiation                           | 1.75 | 0.0495 | FOXF1,SIX2                                  |
| GO:0043392 | Negative regulation of dna binding                        | 1.71 | 0.0002 | MDFI,HAND2,NFIB,MSX1                        |
| GO:0021983 | Pituitary gland development                               | 1.71 | 0.0036 | SALL1,PITX1,MSX1                            |
| GO:2000826 | Regulation of heart morphogenesis                         | 1.71 | 0.0036 | TBX2,HAND2,FOXC1                            |
| GO:0003197 | Endocardial cushion development                           | 1.69 | 0.0040 | TBX2,FOXF1,MSX1                             |
| GO:0042733 | Embryonic digit morphogenesis                             | 1.68 | 0.0003 | TBX2,SALL1,HAND2,MSX1                       |
| GO:0048701 | Embryonic cranial skeleton morphogenesis                  | 1.66 | 0.0050 | SIX2,TBX1,IRX5                              |
| GO:0072088 | Nephron epithelium morphogenesis                          | 1.64 | 0.0004 | SALL1,SIX2,IRX1,IRX3                        |
| GO:0030326 | Embryonic limb morphogenesis                              | 1.60 | 0.0000 | DLX5,TBX2,SALL1,PITX1,HAND2,MSX1,DLX6       |
| GO:2000677 | Regulation of transcription regulatory region dna binding | 1.59 | 0.0073 | HAND2,FOXC1,MSX1                            |
| GO:0035282 | Segmentation                                              | 1.57 | 0.0000 | MEOX2,FOXF1,IRX1,IRX3,FOXC1                 |
| GO:0072009 | Nephron epithelium development                            | 1.57 | 0.0000 | SALL1,SIX2,IRX1,IRX3,FOXC1                  |
| GO:0035050 | Embryonic heart tube development                          | 1.56 | 0.0007 | TBX2,TBX1,HAND2,FOXC1                       |
| GO:0042471 | Ear morphogenesis                                         | 1.55 | 0.0000 | DLX5,SALL1,SIX2,TBX1,MSX1,DLX6              |
| GO:0042475 | Odontogenesis of dentin-containing tooth                  | 1.55 | 0.0007 | TBX1,HAND2,FOXC1,MSX1                       |
| GO:0001656 | Metanephros development                                   | 1.54 | 0.0008 | SALL1,SIX2,IRX1,IRX3                        |
| GO:0001947 | Heart looping                                             | 1.53 | 0.0102 | TBX2,TBX1,HAND2                             |
| GO:0072078 | Nephron tubule morphogenesis                              | 1.53 | 0.0102 | SALL1,IRX1,IRX3                             |
| GO:0001756 | Somitogenesis                                             | 1.52 | 0.0110 | MEOX2,FOXF1,FOXC1                           |
| GO:0060173 | Limb development                                          | 1.51 | 0.0000 | DLX5,TBX2,SALL1,MEOX2,PITX1,HAND2,MSX1,DLX6 |
| GO:0001707 | Mesoderm formation                                        | 1.51 | 0.0114 | FOXF1,SIX2,FOXC1                            |
| GO:0007498 | Mesoderm development                                      | 1.49 | 0.0001 | FOXF1,SIX2,IRX3,TBX1,FOXC1                  |
| GO:0048704 | Embryonic skeletal system morphogenesis                   | 1.48 | 0.0014 | MDFI,SIX2,TBX1,IRX5                         |
| GO:0003208 | Cardiac ventricle morphogenesis                           | 1.48 | 0.0134 | FOXF1,HAND2,FOXC1                           |
| GO:0003151 | Outflow tract morphogenesis                               | 1.47 | 0.0138 | TBX2,TBX1,HAND2                             |
| GO:0014032 | Neural crest cell development                             | 1.46 | 0.0150 | TBX1,HAND2,FOXC1                            |
| GO:0060415 | Muscle tissue morphogenesis                               | 1.46 | 0.0150 | TBX1,ANKRD1,FOXC1                           |
| GO:0003206 | Cardiac chamber morphogenesis                             | 1.45 | 0.0002 | TBX2,FOXF1,TBX1,HAND2,FOXC1                 |
| GO:0051101 | Regulation of dna binding                                 | 1.45 | 0.0002 | MDFI,HAND2,FOXC1,NFIB,MSX1                  |



|            |                                          |      |        |                                                                                 |
|------------|------------------------------------------|------|--------|---------------------------------------------------------------------------------|
| GO:0048562 | Embryonic organ morphogenesis            | 1.42 | 0.0000 | DLX5,MDF1,TBX2,SALL1,FOXF1,SIX2,TBX1,HAND2,MSX1,IRX5,DLX6                       |
| GO:0003205 | Cardiac chamber development              | 1.41 | 0.0000 | TBX2,SALL1,FOXF1,TBX1,HAND2,FOXC1                                               |
| GO:0001708 | Cell fate specification                  | 1.40 | 0.0205 | TBX2,SIX2,TBX1                                                                  |
| GO:0060485 | <i>Mesenchyme development</i>            | 1.38 | 0.0000 | TBX2,FOXF1,SIX2,TBX1,HAND2,FOXC1,MSX1                                           |
| GO:0048762 | <i>Mesenchymal cell differentiation</i>  | 1.38 | 0.0003 | SIX2,TBX1,HAND2,FOXC1,MSX1                                                      |
| GO:0007368 | Determination of left/right symmetry     | 1.38 | 0.0029 | TBX2,FOXF1,TBX1,HAND2                                                           |
| GO:0035270 | Endocrine system development             | 1.38 | 0.0029 | SALL1,PITX1,TBX1,MSX1                                                           |
| GO:0048863 | <i>Stem cell differentiation</i>         | 1.37 | 0.0004 | TBX2,TBX1,HAND2,FOXC1,MSX1                                                      |
| GO:0048565 | Digestive tract development              | 1.35 | 0.0035 | TBX2,SALL1,FOXF1,SIX2                                                           |
| GO:0003231 | Cardiac ventricle development            | 1.35 | 0.0036 | SALL1,FOXF1,HAND2,FOXC1                                                         |
| GO:0090596 | Sensory organ morphogenesis              | 1.34 | 0.0000 | DLX5,TBX2,SALL1,SIX2,TBX1,MSX1,IRX5,DLX6                                        |
| GO:0048705 | <i>Skeletal system morphogenesis</i>     | 1.33 | 0.0000 | DLX5,MDF1,SIX2,TBX1,FOXC1,MSX1,IRX5                                             |
| GO:0051216 | <i>Cartilage development</i>             | 1.33 | 0.0005 | PITX1,SIX2,HAND2,NFIB,MSX1                                                      |
| GO:0042472 | Inner ear morphogenesis                  | 1.32 | 0.0315 | DLX5,TBX1,DLX6                                                                  |
| GO:0003007 | Heart morphogenesis                      | 1.31 | 0.0000 | TBX2,FOXF1,TBX1,HAND2,ANKRD1,FOXC1,MSX1                                         |
| GO:0009952 | Anterior/posterior pattern specification | 1.31 | 0.0001 | MEOX2,FOXF1,SIX2,TBX1,FOXC1,MSX1                                                |
| GO:0007389 | Pattern specification process            | 1.30 | 0.0000 | MDF1,TBX2,MEOX2,FOXF1,SIX2,IRX1,IRX3,TBX1,HAND2,FOXC1,MSX1,MES3                 |
| GO:2000027 | Regulation of animal organ morphogenesis | 1.30 | 0.0000 | TBX2,SIX2,TBX1,HAND2,FOXC1,NFIB,MSX1                                            |
| GO:0060349 | Bone morphogenesis                       | 1.30 | 0.0366 | DLX5,FOXC1,MSX1                                                                 |
| GO:0048568 | Embryonic organ development              | 1.29 | 0.0000 | DLX5,MDF1,TBX2,SALL1,FOXF1,SIX2,TBX1,HAND2,FOXC1,MSX1,IRX5,DLX6                 |
| GO:0003002 | Regionalization                          | 1.29 | 0.0000 | MDF1,MEOX2,FOXF1,SIX2,IRX1,IRX3,TBX1,FOXC1,MSX1                                 |
| GO:0003279 | Cardiac septum development               | 1.29 | 0.0382 | TBX2,SALL1,TBX1                                                                 |
| GO:0048598 | Embryonic morphogenesis                  | 1.28 | 0.0000 | DLX5,MDF1,TBX2,SALL1,FOXF1,PITX1,SIX2,IRX1,IRX3,TBX1,HAND2,FOXC1,MSX1,IRX5,DLX6 |
| GO:0072001 | Renal system development                 | 1.26 | 0.0000 | SALL1,FOXF1,SIX2,IRX1                                                           |

|            |                                                           |      |        |                                                                                             |
|------------|-----------------------------------------------------------|------|--------|---------------------------------------------------------------------------------------------|
|            |                                                           |      |        | ,IRX3,NFIA,FOXC1                                                                            |
| GO:0007219 | Notch signaling pathway                                   | 1.26 | 0.0465 | TBX2,FOXC1,ZNF423                                                                           |
| GO:0060562 | Epithelial tube morphogenesis                             | 1.22 | 0.0000 | TBX2,SALL1,FOXF1,IRX1,IRX3,TBX1,HAND2                                                       |
| GO:0001501 | Skeletal system development                               | 1.20 | 0.0000 | DLX5,MDF1,PITX1,SIX2,TBX1,HAND2,FOXC1,NFIB,MSX1,IRX5,DLX6                                   |
| GO:0048732 | Gland development                                         | 1.20 | 0.0000 | TBX2,SALL1,FOXF1,PITX1,TBX1,HAND2,FOXC1,NFIB,MSX1                                           |
| GO:0007517 | Muscle organ development                                  | 1.17 | 0.0004 | MEOX2,PITX1,TBX1,ANKRD1,FOXC1,MSX1                                                          |
| GO:0048729 | Tissue morphogenesis                                      | 1.15 | 0.0000 | TBX2,SALL1,FOXF1,SIX2,IRX1,IRX3,TBX1,HAND2,ANKRD1,FOXC1,MSX1                                |
| GO:0007423 | Sensory organ development                                 | 1.15 | 0.0000 | DLX5,TBX2,SALL1,SIX2,TBX1,HAND2,FOXC1,MSX1,IRX5,DLX6,MEIS3                                  |
| GO:0002009 | Morphogenesis of an epithelium                            | 1.12 | 0.0000 | TBX2,SALL1,FOXF1,SIX2,IRX1,IRX3,TBX1,HAND2                                                  |
| GO:0009887 | Animal organ morphogenesis                                | 1.11 | 0.0000 | DLX5,MDF1,TBX2,SALL1,FOXF1,SIX2,IRX1,IRX3,TBX1,HAND2,ANKRD1,FOXC1,NFIB,MSX1,IRX5,DLX6,MEIS3 |
| GO:0014706 | Striated muscle tissue development                        | 1.11 | 0.0042 | TBX2,MEOX2,PITX1,ANKRD1,FOXC1                                                               |
| GO:0007507 | Heart development                                         | 1.10 | 0.0000 | TBX2,SALL1,FOXF1,TBX1,HAND2,ANKRD1,FOXC1,MSX1,NFATC1                                        |
| GO:0009790 | Embryo development                                        | 1.09 | 0.0000 | DLX5,MDF1,TBX2,SALL1,MEOX2,FOXF1,PITX1,SIX2,IRX1,IRX3,TBX1,HAND2,FOXC1,MSX1,IRX5,DLX6,MEIS3 |
| GO:0048646 | Anatomical structure formation involved in morphogenesis  | 1.09 | 0.0000 | DLX5,TBX2,SALL1,MEOX2,FOXF1,SIX2,IRX1,IRX3,TBX1,HAND2,ANKRD1,FOXC1,NFIB,MSX1,DLX6           |
| GO:0035239 | Tube morphogenesis                                        | 1.08 | 0.0000 | TBX2,SALL1,MEOX2,FOXF1,SIX2,IRX1,IRX3,TBX1,HAND2,FOXC1,NFIB                                 |
| GO:0061061 | Muscle structure development                              | 1.08 | 0.0000 | TBX2,MEOX2,FOXF1,PITX1,TBX1,ANKRD1,FOXC1,MSX1                                               |
| GO:0042692 | Muscle cell differentiation                               | 1.07 | 0.0272 | TBX2,FOXF1,TBX1,ANKRD1                                                                      |
| GO:0045165 | Cell fate commitment                                      | 1.07 | 0.0288 | TBX2,PITX1,SIX2,TBX1                                                                        |
| GO:0000122 | Negative regulation of transcription by rna polymerase ii | 1.05 | 0.0000 | MDF1,TBX2,SALL1,FOXF1,IRX1,IRX3,TBX1,NFIA,ANKRD1,FOXC1,NFIB,IR                              |

|            |                                                     |      |        |                                                                                                     |
|------------|-----------------------------------------------------|------|--------|-----------------------------------------------------------------------------------------------------|
|            |                                                     |      |        | X2,MSX1,IRX5                                                                                        |
| GO:0048514 | Blood vessel morphogenesis                          | 1.03 | 0.0022 | TBX2,MEOX2,FOXF1,TBX1,HAND2,FOXC1                                                                   |
| GO:0045892 | Negative regulation of transcription, dna-templated | 1.01 | 0.0000 | MDF1,TBX2,SALL1,FOXF1,PITX1,SIX2,IRX1,IRX3,TBX1,NFIA,ANKRD1,FOXC1,NFIB,IRX2,MSX1,IRX5,ZNF423,ZNF658 |
| GO:0035295 | Tube development                                    | 1.01 | 0.0000 | TBX2,SALL1,MEOX2,FOXF1,SIX2,IRX1,IRX3,TBX1,HAND2,NFIA,FOXC1,NFIB                                    |
| GO:0043009 | Chordate embryonic development                      | 1.01 | 0.0000 | MDF1,MEOX2,FOXF1,SIX2,TBX1,HAND2,FOXC1,MSX1,IRX5                                                    |

---

\* The biological processes were identified by String analysis at <https://string-db.org/>. Two-cluster K-means clustering was applied here. Results shown are biological processes with enrichment strength >1 (log(enrichment)).
